# Supplementary material
Source: publisher figshare collection journal article supplement (https://asha.figshare.com/articles/dataset/_/14083373)
Supplement: Supplementary file 1 [file 1]

Supplemental Material S6

*Models for grade 2 predicting grade 3 reading comprehension*

|                                                                                              | Model 1 |       |                 | Model 2 |       |                 | 95% bootstrap<br>CI* |
|----------------------------------------------------------------------------------------------|---------|-------|-----------------|---------|-------|-----------------|----------------------|
|                                                                                              | $\beta$ | SE    | <i>p</i> -value | $\beta$ | SE    | <i>p</i> -value |                      |
| Predicting G3 reading comprehension                                                          |         |       |                 |         |       |                 |                      |
| G2 Spanish language proficiency                                                              | 0.025   | 0.022 | 0.246           | 0.023   | 0.022 | 0.284           | ---                  |
| G2 English language skills                                                                   | 0.580   | 0.05  | < .001          | 0.579   | 0.049 | < .001          | ---                  |
| G2 English word reading                                                                      | 0.501   | 0.056 | < .001          | 0.500   | 0.056 | < .001          | ---                  |
| Predicting G2 English language skills                                                        |         |       |                 |         |       |                 |                      |
| G2 Spanish language proficiency                                                              |         |       |                 | 0.017   | 0.045 | 0.709           | ---                  |
| Predicting G2 English word reading                                                           |         |       |                 |         |       |                 |                      |
| G2 Spanish language proficiency                                                              |         |       |                 | 0.117   | 0.056 | 0.037           | ---                  |
| Effect from G2 Spanish language proficiency to G3 reading comprehension                      |         |       |                 |         |       |                 |                      |
| Total indirect effect (i.e., all mediators)                                                  |         |       |                 | 0.068   | ---   | ---             | [-0.051, 0.144]      |
| Indirect effect from G2 Spanish language proficiency to G3 RC via G2 English language skills |         |       |                 | 0.010   | ---   | ---             | [-0.044, 0.085]      |
| Indirect effect from G2 Spanish language proficiency to G3 RC via G2 English word reading    |         |       |                 | 0.058   | ---   | ---             | [-0.018, 0.128]      |

\*For the 95% CI bootstrap, we used 5,000 bootstraps and the CI has been bias-corrected.

Note: bolded standardized coefficients are significant at the  $\alpha = .05$  level

Model 1 fit: RMSEA = 0.080, 90% CI[0.072, 0.088]; CFI = 0.87; SRMR = 0.069; AIC = 22583.050

Model 2 fit: RMSEA = 0.080, 90% CI[0.078, 0.088]; CFI = 0.87; SRMR = 0.068; AIC = 22584.662
