# Supplementary material
Source: publisher figshare collection journal article supplement (https://asha.figshare.com/articles/dataset/_/14083373)
Supplement: Supplementary file 2 [file 1]

## Supplemental Material S4

*Models for kindergarten predicting grade 3 reading comprehension*

|                                                                                                           | Model 1 |       |         | Model 2 |       |         | 95% bootstrap<br>CI* |
|-----------------------------------------------------------------------------------------------------------|---------|-------|---------|---------|-------|---------|----------------------|
|                                                                                                           | $\beta$ | SE    | p-value | $\beta$ | SE    | p-value |                      |
| Predicting G3 reading comprehension                                                                       |         |       |         |         |       |         |                      |
| K Spanish Semantic Relationships and Memory                                                               | -0.149  | 0.128 | 0.245   | -0.191  | 0.190 | 0.289   | ---                  |
| K Spanish Oral Language                                                                                   | 0.212   | 0.126 | 0.093   | 0.208   | 0.145 | 0.152   | ---                  |
| K English semantic relationships                                                                          | 0.055   | 0.089 | 0.534   | 0.103   | 0.115 | 0.374   | ---                  |
| K English oral language                                                                                   | 0.432   | 0.097 | < .001  | 0.427   | 0.104 | < .001  | ---                  |
| K English word reading                                                                                    | 0.352   | 0.08  | < .001  | 0.358   | 0.085 | < .001  | ---                  |
| K English print knowledge                                                                                 | 0.099   | 0.089 | 0.231   | 0.086   | 0.089 | 0.331   | ---                  |
| Predicting K English Semantic Relationships                                                               |         |       |         |         |       |         |                      |
| K Spanish Semantic Relationships and Memory                                                               |         |       |         | 0.801   | 0.212 | < .001  | ---                  |
| K Spanish Oral Language                                                                                   |         |       |         | -0.185  | 0.206 | 0.368   | ---                  |
| Predicting K English Oral Language                                                                        |         |       |         |         |       |         |                      |
| K Spanish Semantic Relationships and Memory                                                               |         |       |         | 0.496   | 0.199 | 0.013   | ---                  |
| K Spanish Oral Language                                                                                   |         |       |         | 0.126   | 0.180 | 0.485   | ---                  |
| Predicting K English Word Reading                                                                         |         |       |         |         |       |         |                      |
| K Spanish Semantic Relationships and Memory                                                               |         |       |         | 0.395   | 0.186 | 0.034   | ---                  |
| K Spanish Oral Language                                                                                   |         |       |         | -0.159  | 0.172 | 0.357   | ---                  |
| Effect from K Spanish oral language (OL) to G3 reading comprehension (RC)                                 |         |       |         |         |       |         |                      |
| Total indirect effect (i.e., all mediators)                                                               |         |       |         | -0.022  | ---   | ---     | [-0.736, 0.222]      |
| Indirect effect from K Spanish OL to G3 RC via English semantic relationships                             |         |       |         | -0.019  | ---   | ---     | [-0.652, 0.023]      |
| Indirect effect from K Spanish OL to G3 RC via English oral language                                      |         |       |         | 0.054   | ---   | ---     | [-0.141, 0.199]      |
| Indirect effect from K Spanish OL to G3 RC via English word reading                                       |         |       |         | -0.057  | ---   | ---     | [-0.415, 0.043]      |
| Effect from K Spanish semantic relationships and memory (Spanish SR & M) to G3 reading comprehension (RC) |         |       |         |         |       |         |                      |
| Total indirect effect (i.e., all mediators)                                                               |         |       |         | 0.436   | ---   | ---     | [0.113, 1.570]       |
| Indirect effect from K Spanish SR & M to G3 RC via K English semantic relationships                       |         |       |         | 0.082   | ---   | ---     | [-0.137, 0.700]      |
| Indirect effect from K Spanish SR & M to G3 RC via K English oral language                                |         |       |         | 0.212   | ---   | ---     | [0.041, 0.628]       |
| Indirect effect from K Spanish SR & M to G3 RC via K English word reading                                 |         |       |         | 0.141   | ---   | ---     | [-0.005, 0.630]      |

\*For the 95% CI bootstrap, we used 5,000 bootstraps and the CI has been bias-corrected.

Note: bolded standardized coefficients are significant at the  $\alpha = .05$  level

Model 1 fit: RMSEA = 0.069, 90%CI[0.063, 0.076]; CFI = 0.89; SRMR = 0.171; AIC = 35250.154

Model 2 fit: RMSEA = 0.063, 90% CI[0.057, 0.070]; CFI = 0.91; SRMR = 0.064; AIC = 35168.983
