# Supplementary material
Source: publisher figshare collection journal article supplement (https://asha.figshare.com/articles/dataset/_/14083373)
Supplement: Supplementary file 3 [file 1]

Supplemental Material S5

*Models for grade 1 predicting grade 3 reading comprehension*

|                                                                                           | Model 1 |       |                 | Model 2 |       |                 | 95% bootstrap<br>CI* |
|-------------------------------------------------------------------------------------------|---------|-------|-----------------|---------|-------|-----------------|----------------------|
|                                                                                           | $\beta$ | SE    | <i>p</i> -value | $\beta$ | SE    | <i>p</i> -value |                      |
| Predicting G3 reading comprehension                                                       |         |       |                 |         |       |                 |                      |
| G1 Spanish oral language                                                                  | 0.023   | 0.055 | 0.681           | 0.000   | 0.061 | 0.998           | ---                  |
| G1 English oral language & English memory                                                 | 0.506   | 0.05  | < .001          | 0.511   | 0.052 | < .001          | ---                  |
| G1 English word reading                                                                   | 0.533   | 0.053 | < .001          | 0.529   | 0.053 | < .001          | ---                  |
| Predicting G1 English Oral language & English memory                                      |         |       |                 |         |       |                 |                      |
| G1 Spanish oral language                                                                  |         |       |                 | 0.325   | 0.120 | 0.007           | ---                  |
| Predicting G1 English word reading                                                        |         |       |                 |         |       |                 |                      |
| G1 Spanish oral language                                                                  |         |       |                 | 0.092   | 0.113 | 0.414           | ---                  |
| Effect from G1 Spanish oral language (OL) to G3 reading comprehension (RC)                |         |       |                 |         |       |                 |                      |
| Total indirect effect (i.e., all mediators)                                               |         |       |                 | 0.215   | ---   | ---             | [-0.007, 0.406]      |
| Indirect effect from G1 Spanish OL to G3 RC via G1 English oral language & English memory |         |       |                 | 0.166   | ---   | ---             | [0.050, 0.280]       |
| Indirect effect from G1 Spanish OL to G3 RC via G1 English word reading                   |         |       |                 | 0.049   | ---   | ---             | [-0.072, 0.151]      |

\*For the 95% CI bootstrap, we used 5,000 bootstraps and the CI has been bias-corrected.

Note: bolded standardized coefficients are significant at the  $\alpha = .05$  level

Model 1 fit: RMSEA = 0.074, 90% CI[0.067, 0.081]; CFI = 0.89; SRMR = 0.091; AIC = 27970.354

Model 2 fit: RMSEA = 0.073, 90% CI[0.066, 0.081]; CFI = 0.90; SRMR = 0.073; AIC = 27960.275
